# Supplementary material for: Abatement of dichloromethane with high selectivity over defect-rich MOF-derived Ru/TiO2 catalysts
Source: Royal Society of Chemistry journal article supplement (doi:10.1039/d2nr04261d), 2022-01-01
Supplement: d2nr04261d1.pdf [file d2nr04261d1.pdf]

## Supplementary Information

### Abatement of dichloromethane with high selectivity over defect-rich MOFs derived Ru/TiO<sub>2</sub> catalysts

Shaohua Chai<sup>a, b</sup>, Shuangde Li<sup>a, \*</sup>, Le Zhang<sup>a, b</sup>, Guijun Fan<sup>a, b</sup>, Linfeng  
Nie<sup>a</sup>, Xin Zhou<sup>a, b</sup>, Wuxinchen Yang<sup>a, b</sup>, Weiman Li<sup>a</sup>, Yunfa Chen<sup>a, b, c</sup>,

\*

<sup>a</sup> *State Key Laboratory of Multi-phase Complex Systems, Institute of  
Process Engineering, Chinese Academy of Sciences, Beijing 100190,  
China*

<sup>b</sup> *College of Materials Science and Opto-Electronic Technology,  
University of Chinese Academy of Sciences, No. 19A Yuquan Road, Beijing  
100049, China*

<sup>c</sup> *CAS Center for Excellence in Urban Atmospheric Environment, Xiamen  
361021, China*

\* Corresponding authors. E-mail addresses: [sdli@ipe.ac.cn](mailto:sdli@ipe.ac.cn);  
[chenyf@ipe.ac.cn](mailto:chenyf@ipe.ac.cn)

#### Catalyst characterization procedures

X-ray diffraction (XRD) patterns of the catalysts were measured with a Smartlab using Cu K $\alpha$  radiation. The specific surface area (SSA) was calculated by the N<sub>2</sub> adsorption–desorption isotherms at 77 K by the Brunauer-Emmett-Teller (BET) method with a SSA-7300 (Builder,

China), all the catalysts were outgassed under vacuum at 150 °C for 8 h prior to the measurement. The weight percent of ruthenium in the catalysts was determined by an inductively coupled plasma-optical emitting spectrometer (ICP-OES, Agilent 5110, USA). The scanning electron spectroscopy was carried on JSM-7800 (Prime) to obtain the surface morphology of the samples. Transmission electron microscopy (TEM) images were collected on JEOL 2100F. X-ray absorption of fine structures (XAFS) measurements of Ru K-edge were performed at Beijing Synchrotron Radiation Facility (BSRF). X-ray photoelectron spectroscopy (XPS, Thermo Fisher Scientific ESCALAB 250 Xi spectrometer) was used to determine the binding energies (BEs) of Ti 2p, Ru 3d, O 1s, N 1s and C 1s, and the spectra were calibrated with the C1s peak at 284.8 eV as an internal standard. NH<sub>3</sub>-temperature programmed desorption (NH<sub>3</sub>-TPD), O<sub>2</sub>-temperature programmed desorption (O<sub>2</sub>-TPD) and H<sub>2</sub>-temperature programmed reduction (H<sub>2</sub>-TPR) were carried out on a Micromeritics Autochem II 2920 equipped with a thermal conductivity detector (TCD). As for NH<sub>3</sub>-TPD, the catalysts (100 mg) were firstly pretreated in N<sub>2</sub> flow at 200 °C for 1 h. Upon cooling down to 50 °C, the absorption of NH<sub>3</sub> was performed in a flow of 10% NH<sub>3</sub>/He over the catalysts for 1 h following the remove of physically absorbed NH<sub>3</sub> by purging with He for 0.5 h. Then NH<sub>3</sub> desorption was carried out from 50 °C to 700 °C with a heating rate of 10 °C /min. The O<sub>2</sub>-TPD and H<sub>2</sub>-TPR experiments were carried out under

pulse 5% O<sub>2</sub>/He, and 10% H<sub>2</sub>/He, respectively, and other steps and conditions of experiment were same as NH<sub>3</sub>-TPD. Pyridine adsorbed IR spectroscopy (Py-IR) was conducted using an FT-IR (Tensor 27, Bruker, Germany) equipped with a custom-made IR cell that was connected by a vacuum adsorption apparatus. The catalyst was first heated at a rate of 10 °C /min to 300 °C and then cooled down to room temperature in a vacuum (10<sup>-3</sup> Pa). After that, pyridine vapor was introduced until the adsorption approached saturation. The desorption process was conducted by heat-treatment of the adsorbed catalyst with the heating rate of 10 °C/min to 150 °C. The amount of Lewis acid and Bronsted acid are calculated based on the area of characteristic absorption peaks at 1450 cm<sup>-1</sup> and 1540 cm<sup>-1</sup>, respectively, the extinction coefficient ratio of Lewis acid and Brønsted acid is 1.32 according to  $\epsilon_{1450} / \epsilon_{1540}$ .

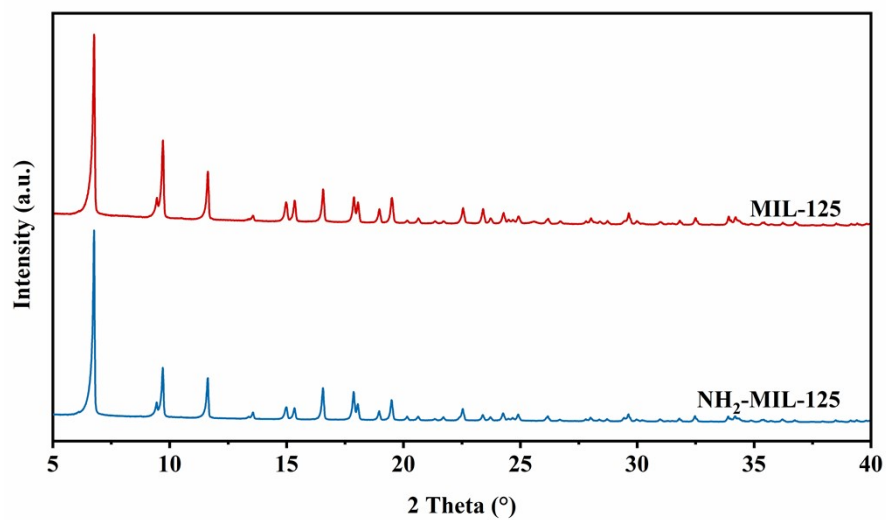

**Fig. S1** XRD patterns of MIL-125 and NH<sub>2</sub>-MIL-125

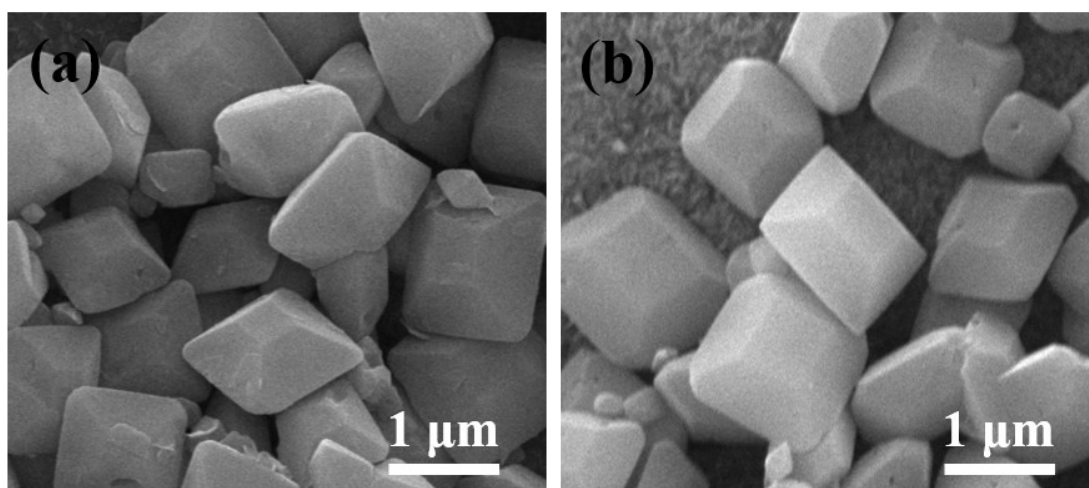

**Fig. S2** SEM images of MIL-125 (a) and NH<sub>2</sub>-MIL-125 (b)

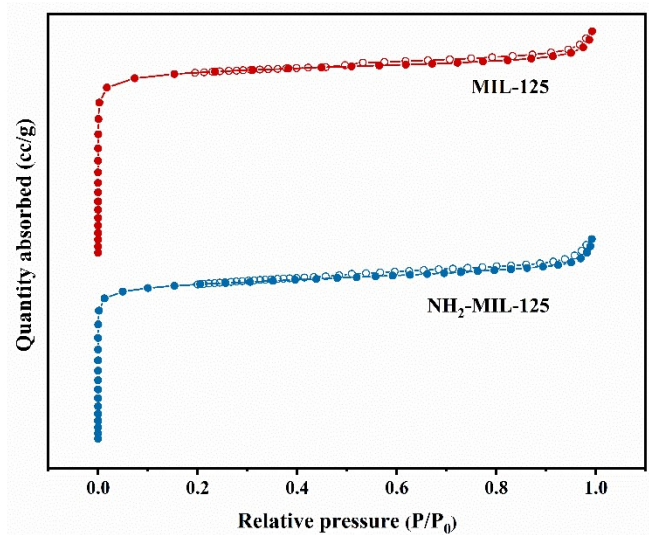

**Fig. S3** N<sub>2</sub> adsorption-desorption isotherms of MIL-125 and NH<sub>2</sub>-MIL-125

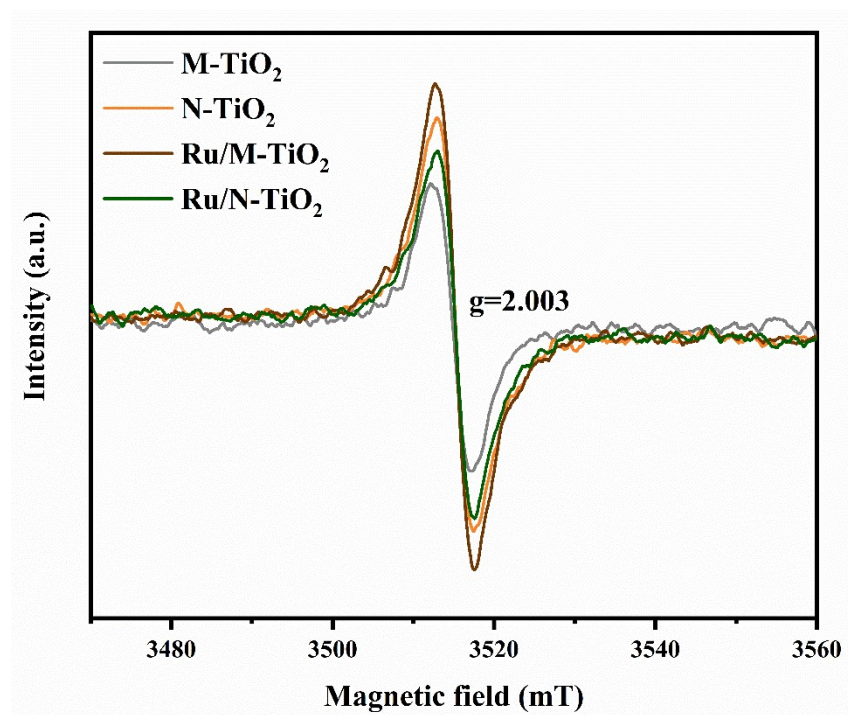

**Fig. S4** ESR spectra of catalysts

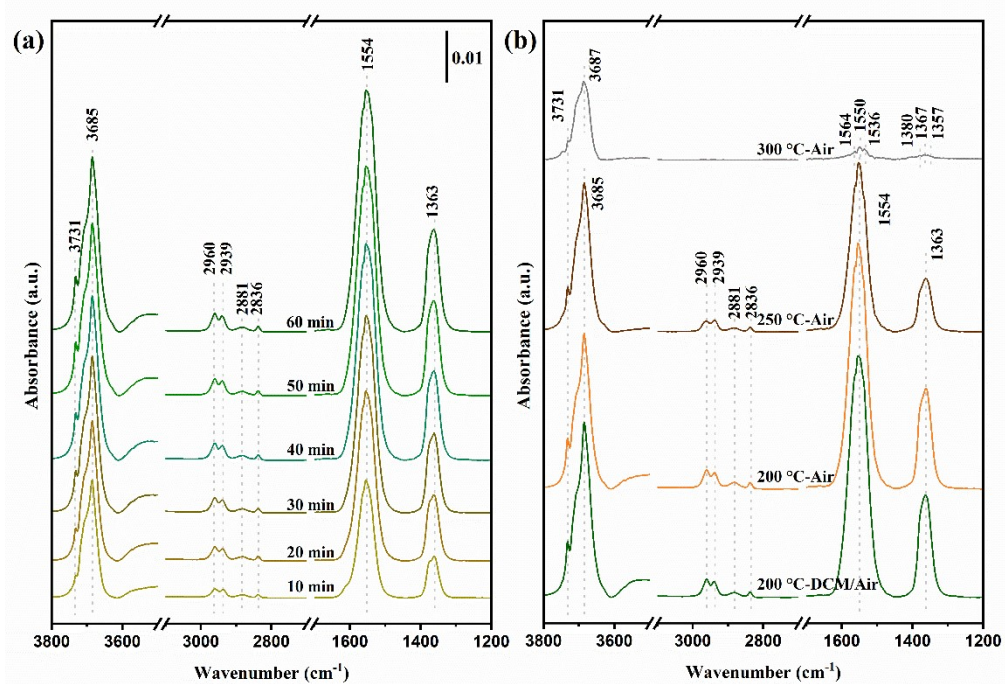

**Fig. S5** In situ DRIFT spectra of (a) DCM oxidation over M-TiO<sub>2</sub> at 200 °C and (b) intermediates over M-TiO<sub>2</sub> exposed to air from 200 to 300 °C

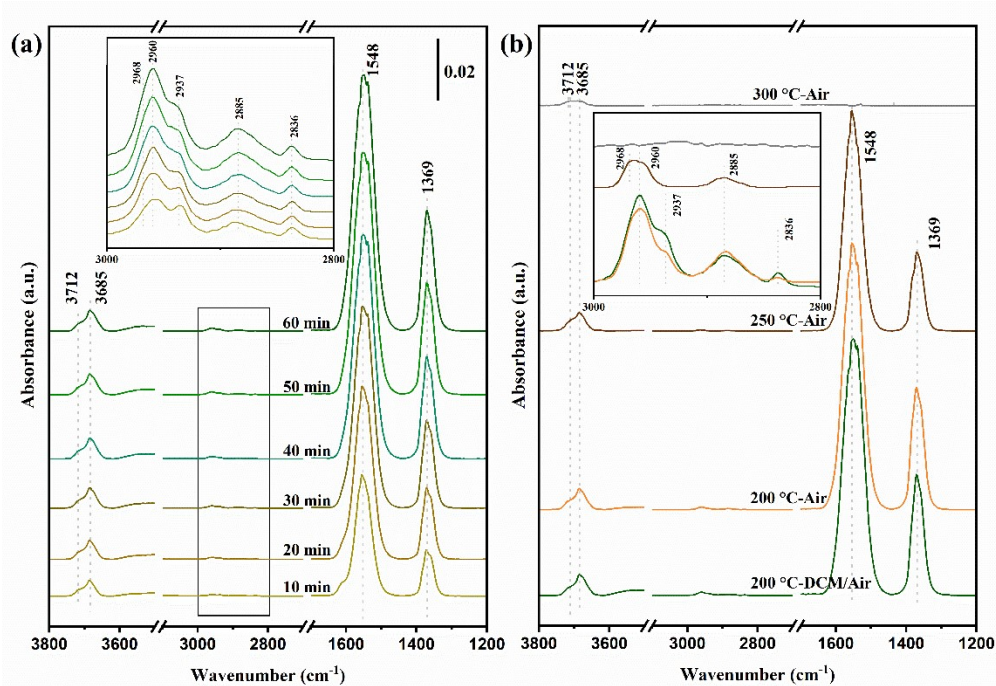

**Fig. S6** In situ DRIFT spectra of (a) DCM oxidation over Ru/M-TiO<sub>2</sub> at 200 °C and (b) intermediates over Ru/M-TiO<sub>2</sub> exposed to air from 200 to 300 °C
